# Supplementary material
Source: Springer Nature journal article supplement (https://www.springermedizin.de/resource/supplementary/13058_2013_3349_MOESM6_ESM.pdf/9703904)
Supplement: MOESM6 [file 9703904]

**Table 1:** Patient characteristic in TNBC

| Characteristics                          | TN-IBC<br>No of patients (%) |         | TN-Non-IBC<br>No of patients (%) |         | P-value |
|------------------------------------------|------------------------------|---------|----------------------------------|---------|---------|
| <b>Total no. of Patients</b>             | 41                           |         | 53                               |         |         |
| <b>Age (years) Mean (min-max)</b>        | 50.2 (26-78)                 |         | 54.0 (28-77)                     |         |         |
| <b>Clinical Stage at Diagnosis</b>       |                              |         | I                                | 10 (19) | < 0.01  |
|                                          |                              |         | II                               | 18 (34) |         |
|                                          | III                          | 28 (68) | III                              | 18 (34) |         |
|                                          | IV                           | 6 (14)  | IV                               | 7 (13)  |         |
|                                          | Unknown                      | 7 (17)  | Unknown                          | 0 (0)   |         |
| <b>Nuclear Grade</b>                     | I                            | 0 (0)   | I                                | 3 (6)   | 0.135   |
|                                          | II                           | 5 (12)  | II                               | 12 (23) |         |
|                                          | III                          | 34 (83) | III                              | 37 (70) |         |
|                                          | Unknown                      | 2 (5)   | Unknown                          | 1 (2)   |         |
| <b>Tumor Embolism</b>                    | Positive                     | 25 (61) | Positive                         | 3 (6)   | < 0.01  |
|                                          | Negative                     | 12 (29) | Negative                         | 21 (40) |         |
|                                          | Unknown                      | 4 (10)  | Unknown                          | 29 (54) |         |
| <b>Neoadjuvant Therapy (stage I-III)</b> | Positive                     | 22 (79) | Positive                         | 31 (67) | 0.278   |
|                                          | Negative                     | 5 (18)  | Negative                         | 15 (33) |         |
|                                          | Unknown                      | 1 (3)   | Unknown                          | 0 (0)   |         |
